# Supplementary material for: Studies on characterization, telomerase inhibitory properties and G-quadruplex binding of η6-arene ruthenium complexes with 1,10-phenanthroline-derived ligands
Source: Royal Society of Chemistry journal article supplement (doi:10.1039/c1dt11676b), 2011-12-08
Supplement: c1dt11676b.pdf [file c1dt11676b.pdf]

# Studies on characterization, telomerase inhibitory properties and G-quadruplex binding of $\eta^6$ -arene ruthenium complexes with 1,10-phenanthroline-derived ligands

Dongdong Sun,<sup>a</sup> Rong Zhang,<sup>a</sup> Fang Yuan,<sup>a</sup> Du Liu,<sup>a</sup> Yanhui Zhou,<sup>a</sup> Wenjie Mei,<sup>\*a, b</sup> and Jie Liu<sup>\*a</sup>

<sup>a</sup>Department of Chemistry, Jinan University, Guangzhou 510632, PR China. Fax: +86-20-8522-1263. E-mail: tliuliu@jnu.edu.cn

<sup>b</sup>School of Pharmacy, Guangdong Pharmaceutical University, Guangzhou 510006, PR China. Fax: +86-20-39352129. E-mail: wenjiemei@126.com

Eq. (1)

$$\frac{(\varepsilon_a - \varepsilon_f)}{(\varepsilon_a - \varepsilon_b)} = \frac{(b - (b^2 - 2K_b^2 C_t [\text{DNA}]/s)^{1/2})}{2K_b C_t} \quad (1a)$$

$$b = \frac{1 + K_b C_t + K_b [\text{DNA}]}{2s} \quad (1b)$$

where [DNA] is the concentration of DNA in nucleotides,  $\varepsilon_a$  is the molar absorption coefficient ( $A_{\text{abs}}/[M]$ ) of the MLCT absorption band at a given DNA concentration,  $\varepsilon_f$  and  $\varepsilon_b$  are the molar absorption coefficients of the free Ru<sup>II</sup> complex and the molar absorption coefficient of the Ru<sup>II</sup> complex in the fully bound form, respectively.  $K_b$  is the equilibrium binding constant in  $M^{-1}$ ,  $C_t$  is the total Ru<sup>II</sup> complex concentration, and  $s$  is the binding site size. Eq. (1) has been applied to titration data for noncooperative metallointercalator binding to DNA.

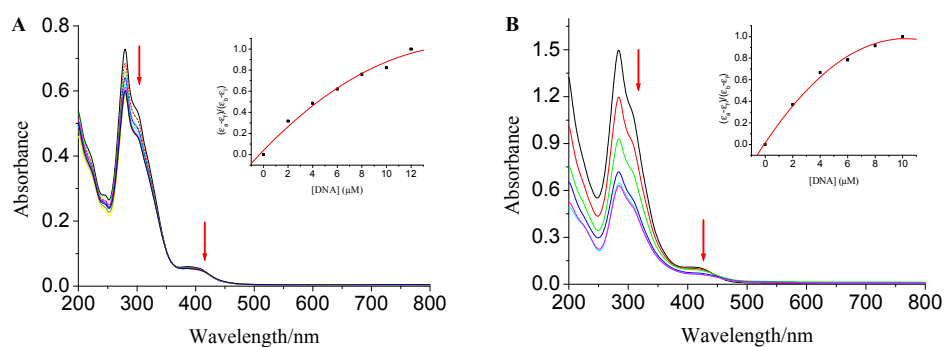

Figure S1. Absorption spectra of complexes **1** (A) and **2** (B) in buffer with increasing amounts of G-quadruplex. [Ru] = 10.0 or 20  $\mu\text{M}$ , [CT-DNA] = 0-12  $\mu\text{M}$  from top to bottom. Arrows refer to the change in absorbance upon increasing the DNA concentration.

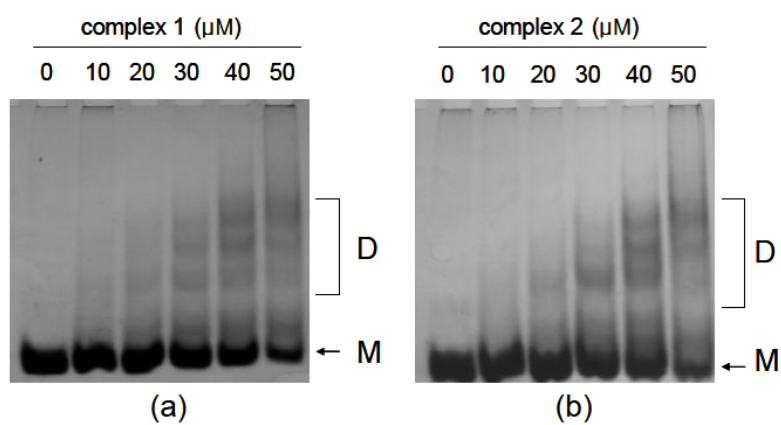

Figure S2. Effect of complex **1** (a) and **2** (b) on the assembly of the HTG21 structure illustrated by native PAGE analysis. Ruthenium complexes at the indicated concentration were incubated with HTG21 (10 μM) at 20 °C in a buffer containing 10 mM Tris, 1 mM EDTA, 100 mM KCl, pH 8.0. Major bands were identified as monomer (M), dimer (D).

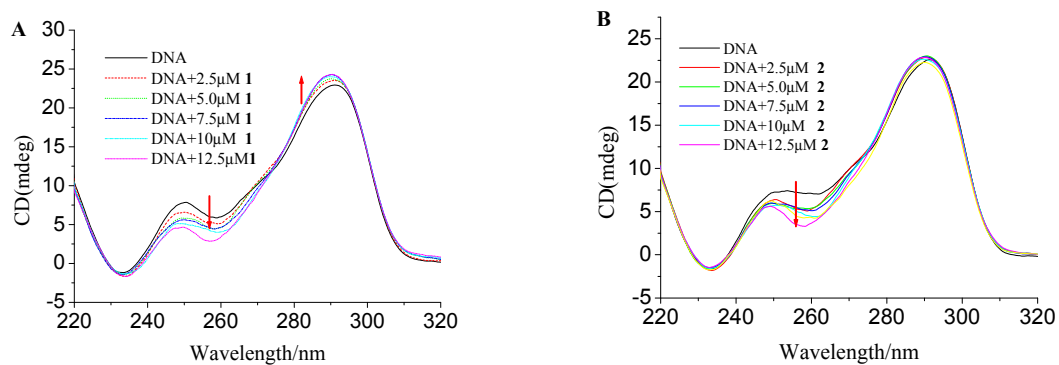

Figure S3. CD spectra of HTG21 acquired at 20 °C in the absence or presence of different concentrations of 1 (A) and 2 (B). All experiments were carried out in 10 mM Tris-HCl, 100 mM KCl, pH 7.4. The HTG21 concentration is 2 μM.

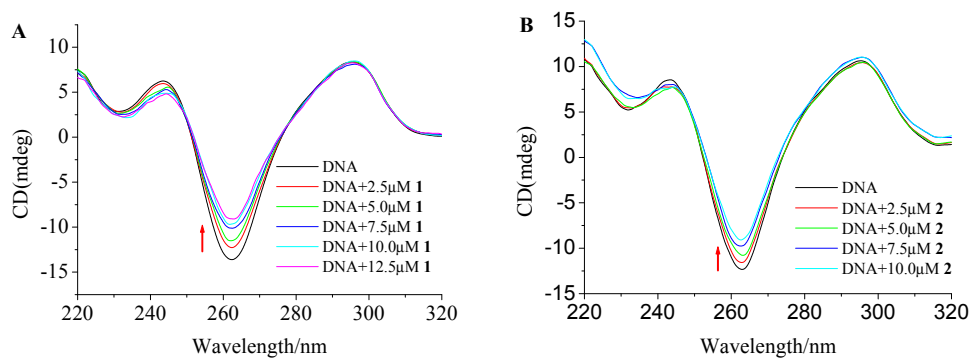

Figure S4. CD spectra of HTG21 acquired at 20 °C in the absence or presence of different concentrations of 1 (A) and 2 (B). All experiments were carried out in 10 mM Tris-HCl, 100 mM NaCl, pH 7.4. The HTG21 concentration is 2 μM.

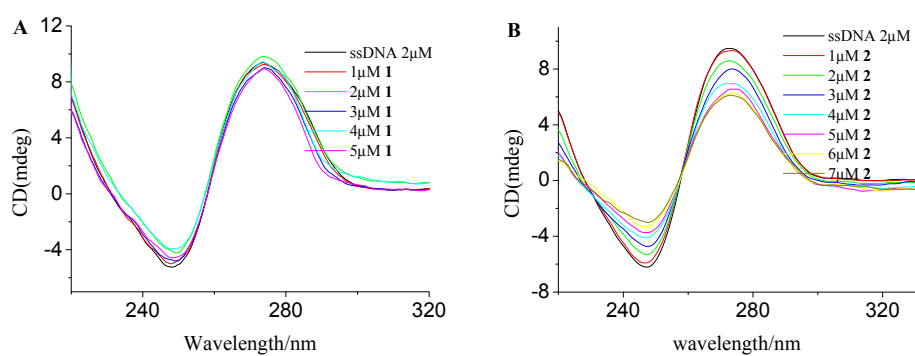

Figure S5. CD spectra of ssDNA acquired at 20 °C in the absence or presence of different concentrations of **1**(A) and **2**(B). All experiments were carried out in 10 mM Tris-HCl, pH 7.4. The HTG21 concentration is 2 μM.

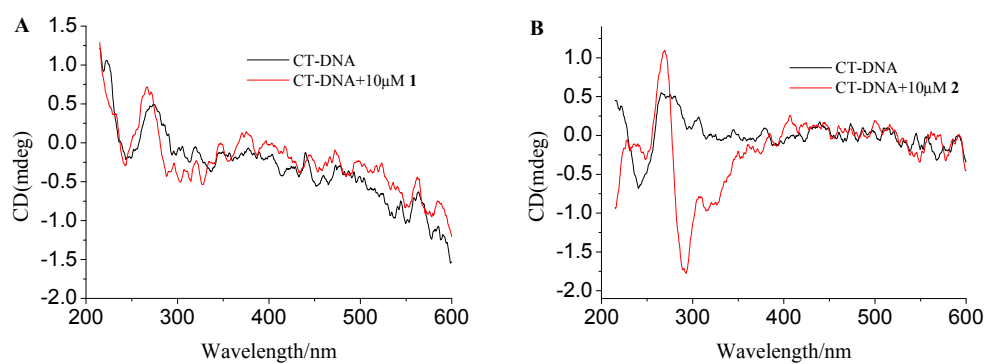

Figure S6. CD spectra of CT-DNA(10 $\mu$ M) in 10 mM Tris-HCl, 100 mM KCl, pH = 7.5 buffer at 25 °C in the presence of increasing amounts of **1** (A) and **2** (B), [Ru]/[DNA] = 1:1.



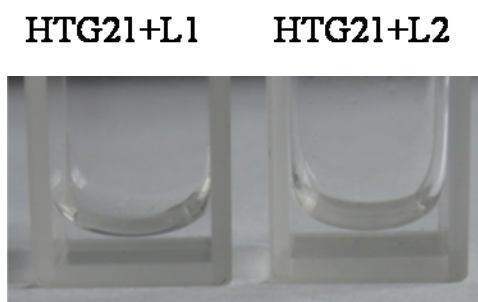

Figure S7. Characterizations of the DNzyme functions of HTG21 DNA in the presence of 500 nM L1 and 500 nM L2 in the TMB-H<sub>2</sub>O<sub>2</sub> system. Conditions: TMB, 266 mM in Tris-MES buffer (25 mM MES, pH = 5.10); H<sub>2</sub>O<sub>2</sub>, 794 mM; DNA, 500 nM; hemin, 500 nM. (L1 = p-MOPIP, L2 = p-CFPIP)

Table S1. Absorption spectra ( $\lambda_{\max}/\text{nm}$ ) and DNA-binding constants  $K_b$  ( $\times 10^5 \text{ M}^{-1}$ ) of complexes **1** and **2**.

| complex | DNA    | $\lambda_{\max}(\text{free})$ | $\lambda_{\max}(\text{bound})$ | $\Delta\lambda/\text{nm}$ | $H\%$ | $K_b/10^5 \text{ M}^{-1}$ |
|---------|--------|-------------------------------|--------------------------------|---------------------------|-------|---------------------------|
| 1       | HTG21  | 279                           | 281                            | 2                         | 29.3  |                           |
|         |        | 425                           | 425                            | 0                         | 19.2  | 3.87                      |
|         | CT-DNA | 282                           | 282                            | 0                         | 17.5  |                           |
|         |        | 425                           | 425                            | 0                         | 12.5  | 1.04                      |
| 2       | HTG21  | 279                           | 277                            | -2                        | 26.8  |                           |
|         |        | 425                           | 425                            | 0                         | 18.5  | 2.14                      |
|         | CT-DNA | 282                           | 280                            | -2                        | 57.8  |                           |

Table S2. IC<sub>50</sub> Values of Tested Compounds towards Different Cell Lines<sup>a</sup>

| Complexes | IC <sub>50</sub> ( $\mu$ M) |                 |                 |                 |                 |
|-----------|-----------------------------|-----------------|-----------------|-----------------|-----------------|
|           | HepG2                       | HeLa            | A549            | SW620           | NIH/3T3         |
| 1         | 24.35 $\pm$ 3.3             | 8.70 $\pm$ 2.2  | 35.72 $\pm$ 2.5 | 17.48 $\pm$ 2.4 | >100            |
| 2         | 28.56 $\pm$ 3.7             | 14.50 $\pm$ 3.5 | 46.41 $\pm$ 4.2 | 26.63 $\pm$ 2.3 | 48.37 $\pm$ 4.7 |
| Cisplatin | 13.63 $\pm$ 1.1             | 7.51 $\pm$ 1.2  | 3.16 $\pm$ 0.2  | 29.98 $\pm$ 1.8 | 19.72 $\pm$ 1.5 |

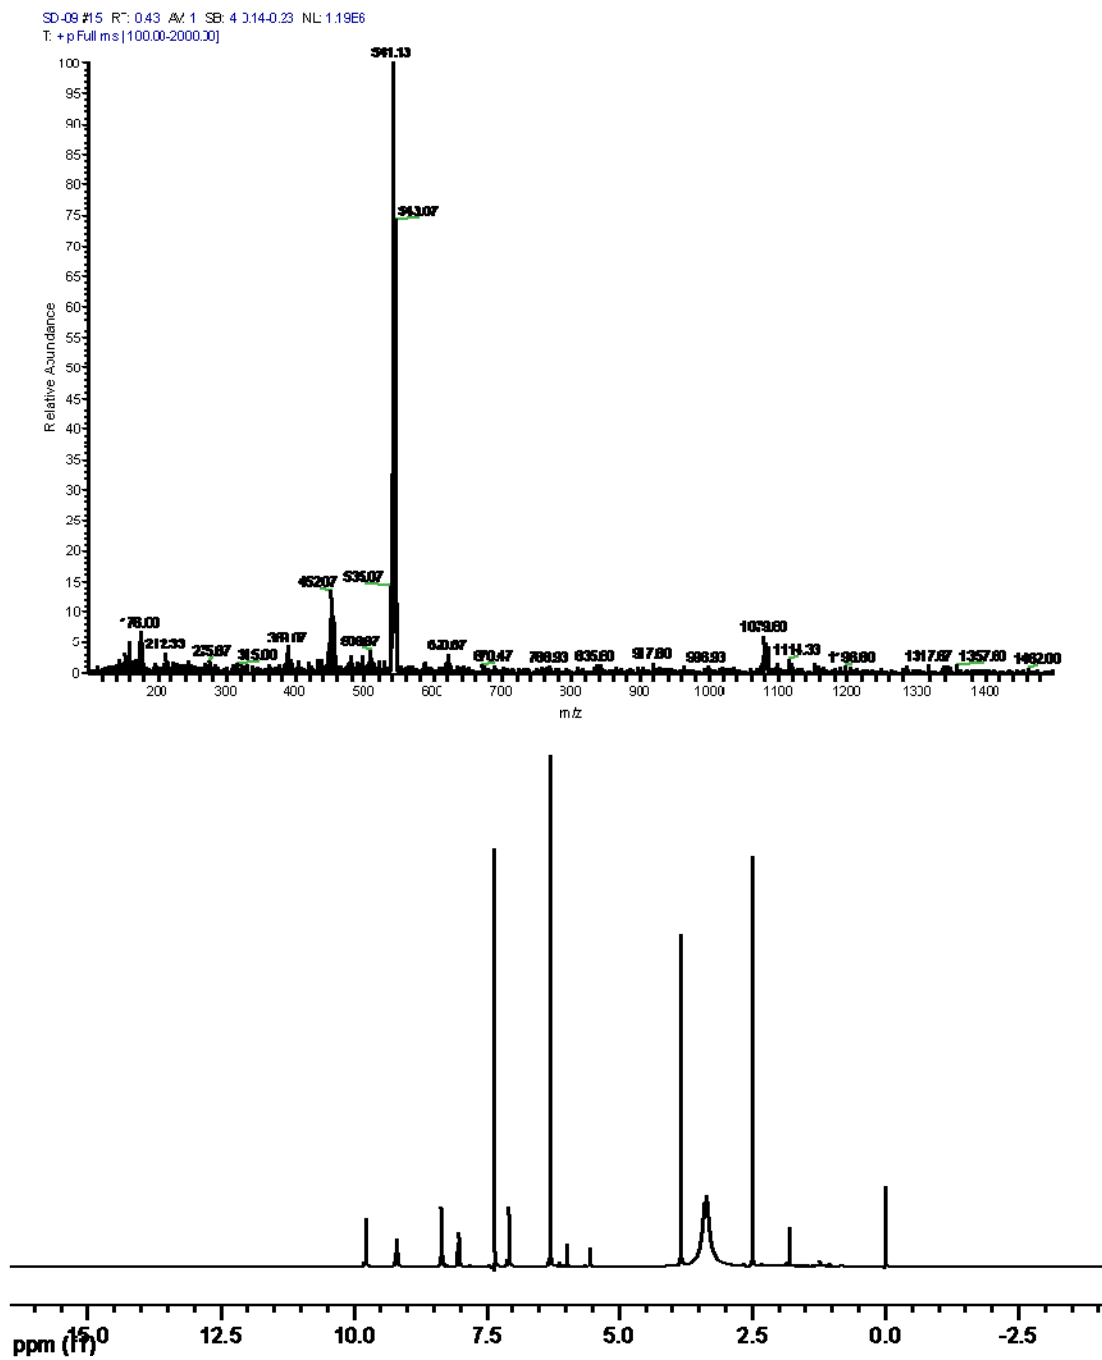

Figure S8. ESI-MS and  $^1\text{H}$  NMR spectra of complex 1.

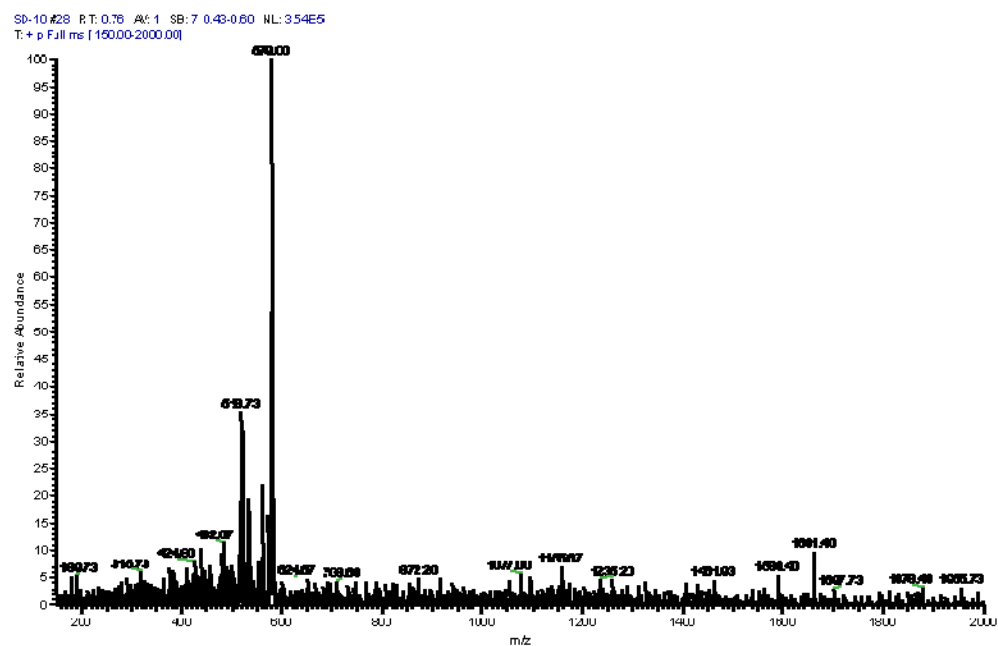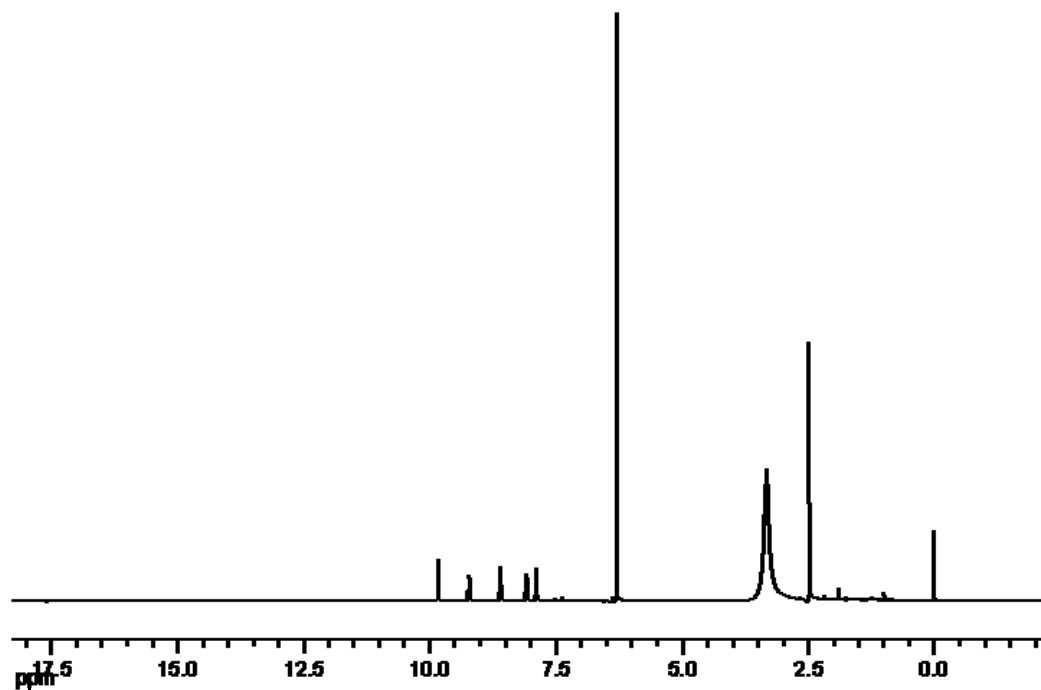

Figure S9. ESI-MS and  $^1\text{H}$  NMR spectra of complex 2.
